# Supplementary material
Source: PubMed Central journal article supplement (PMC2647587)

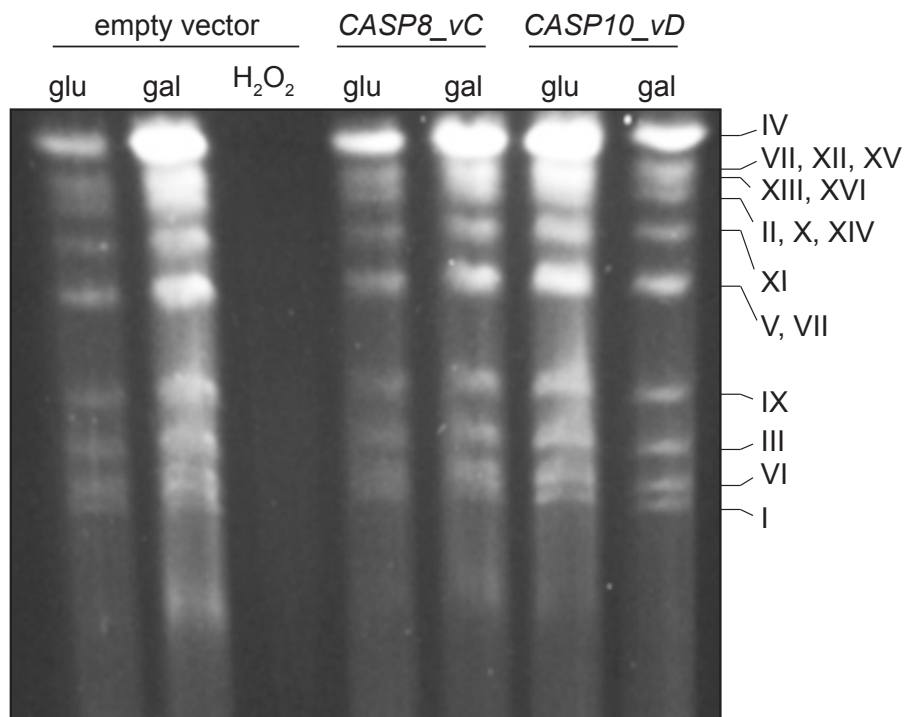

Supplement: NIHMS85312-supplement-03.pdf [file NIHMS85312-supplement-03.pdf]

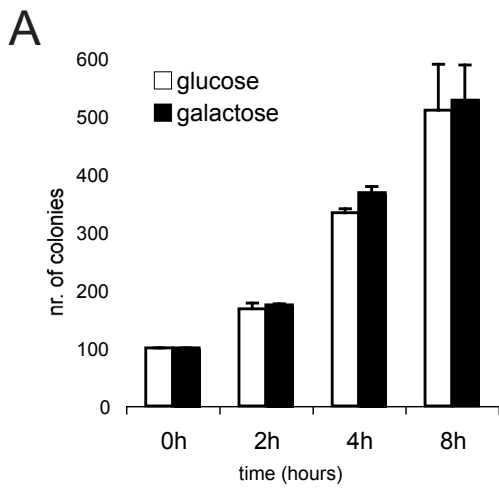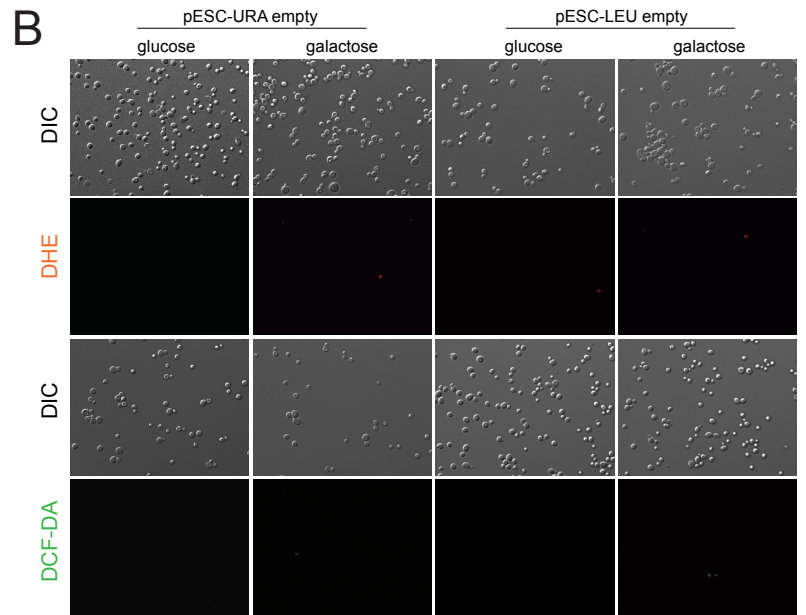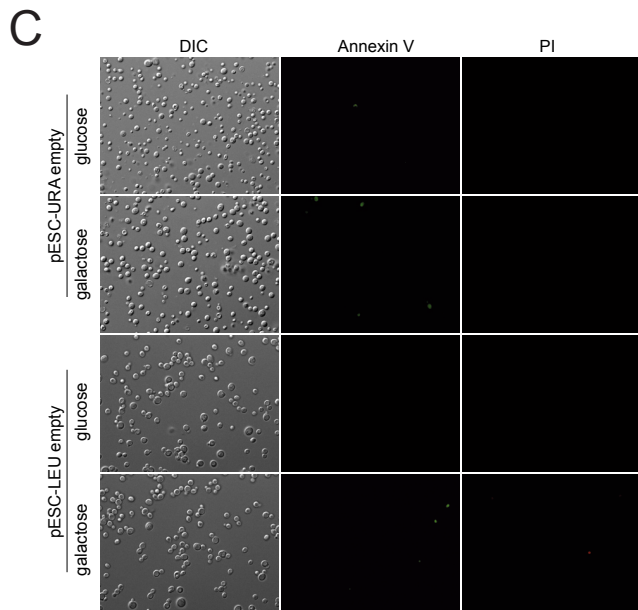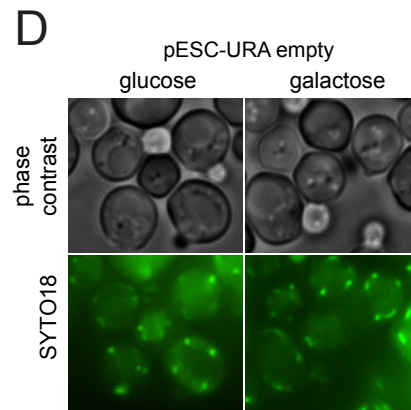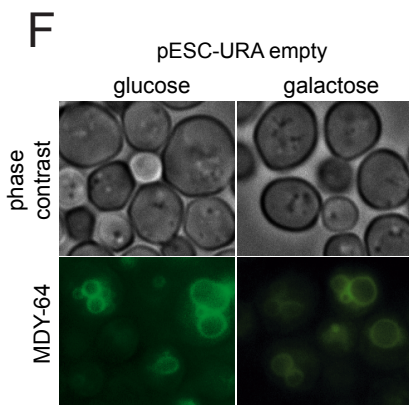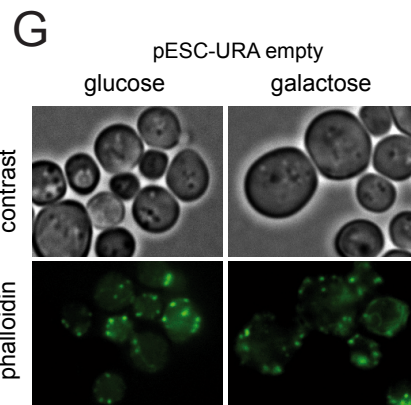

Supplement: NIHMS85312-supplement-04.pdf [file NIHMS85312-supplement-04.pdf]
